# Supplementary material for: Effect of HAuCl4concentration on electrochemical DNA sensing behaviors of Au/nanoSPAN nanocomposite
Source: Royal Society of Chemistry journal article supplement (doi:10.1039/c4ay01219d), 2014-09-18
Supplement: c4ay01219d1.pdf [file c4ay01219d1.pdf]

## Supporting materials

### **Effect of H<sub>Au</sub>Cl<sub>4</sub> concentration on electrochemical DNA sensing behaviors of Au/nanoSPAN nanocomposite**

Changming Mao,<sup>a</sup> Huaiyin Chen,<sup>b</sup> FangLin Du<sup>a\*</sup>

<sup>a</sup> College of Materials Science and Engineering, <sup>b</sup>Key Laboratory of Eco-chemical Engineering (Ministry of Education), College of Chemistry and Molecular Engineering, Qingdao University of Science and Technology, Qingdao 266042, P. R. China

**EDS results of Au/nanoSPAN/CPE**

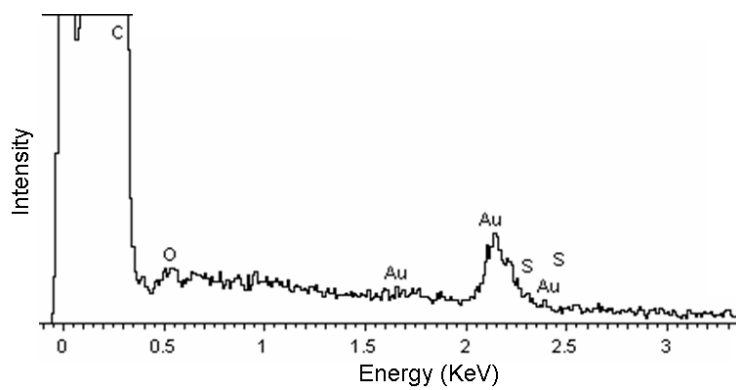

**Fig. S1.** EDS results of Au/nanoSPAN/CPE.

## The effect of solution pH on the electrochemistry of Au/nanoSPAN/CPE

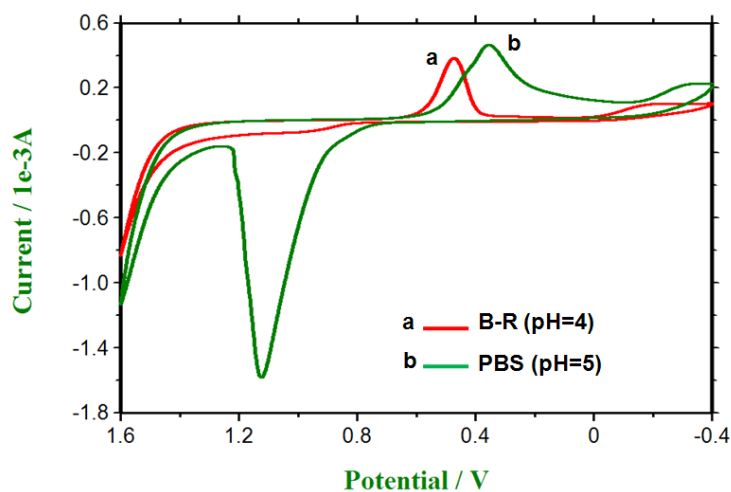

**Fig. S2.** CVs of Au/nanoSPAN/CPE in Britton–Robinson (B-R, pH=4) and phosphate buffer solution (PBS, pH=5)

As shown in Fig. S2, CVs of Au/nanoSPAN/CPE in B-R (pH=4) and PBS (pH=5) were also recorded for comparison with 0.5 M H<sub>2</sub>SO<sub>4</sub> solution in Fig. 2. The result stated that the reduction peak potentials shifted negatively with the increase of the solution pH compared with 0.5 M H<sub>2</sub>SO<sub>4</sub>. In PBS (pH=5), an obvious oxidation peak appeared. The detailed mechanism is not unclear now.
